# Supplementary material
Source: PubMed Central journal article supplement (PMC3138629)
Supplement: NIHMS291176-supplement-01.pdf [file NIHMS291176-supplement-01.pdf]

Supporting Information for: Computational modeling of in vitro biological responses on polymethacrylate surfaces by Ghosh et al.

The tables below contain the experimental data collected for protein attachment, cell attachment and cell proliferation for the homopolymers, copolymers, and terpolymers described in the manuscript.

**Protein attachment-Homopolymers**

| # | Name                              | Exp   | SD    |
|---|-----------------------------------|-------|-------|
| 1 | poly-noctyl-MA                    | 103.0 | 11.9  |
| 2 | poly-butyl-MA                     | 111.9 | 14.6  |
| 3 | poly-isobutyl-MA                  | 116.8 | 16.3  |
| 4 | poly-ethyleneglycolmehtylether-MA | 180.0 | 41.3  |
| 5 | poly-benzyl-MA                    | 233.1 | 30.2  |
| 6 | poly-2hydroxypropyl-MA            | 329.2 | 73.9  |
| 7 | poly-tetrahydrofurfuryl-MA        | 437.2 | 112.7 |
| 8 | poly-phenyl-MA                    | 520.6 | 127.8 |

**Protein attachment-Copolymers**

| #  | Name                                      | Comp. 1 | Comp. 2 | Exp     | SD     |
|----|-------------------------------------------|---------|---------|---------|--------|
| 1  | benzyl-hydroxypropyl                      | 51      | 49      | 291.5   | 45.5   |
| 2  | benzyl-hydroxypropyl                      | 71      | 29      | 118.8   | 15.8   |
| 3  | benzyl-methyl                             | 21      | 79      | 258.8   | 64.3   |
| 4  | benzyl-methyl                             | 50      | 50      | 233.1   | 46.7   |
| 5  | benzyl-methyl                             | 70      | 30      | 432.2   | 58.1   |
| 6  | benzyl-methyl                             | 30      | 70      | 694.0   | 162.1  |
| 7  | cyclohexyl-hydroxypropyl                  | 23      | 77      | 236.3   | 42.6   |
| 8  | cyclohexyl-hydroxypropyl                  | 51      | 49      | 415.6   | 75.3   |
| 9  | cyclohexyl-methyl                         | 21      | 79      | 815.6   | 194.0  |
| 10 | cyclohexyl-methyl                         | 44      | 56      | 802.4   | 200.6  |
| 11 | cyclohexyl-methyl                         | 75      | 25      | 597.3   | 94.6   |
| 12 | dimethylaminoethyl-methyl                 | 63      | 37      | 10372.4 | 1075.2 |
| 13 | ethylene glycol methyl ether-hydroxyethyl | 78      | 22      | 228.4   | 53.4   |
| 14 | ethylene glycol methyl ether-hydroxyethyl | 32      | 68      | 69.0    | 10.6   |
| 15 | ethylene glycol methyl ether-Methyl       | 53      | 47      | 682.8   | 153.8  |
| 16 | ethylene glycol methyl ether-methyl       | 76      | 24      | 104.5   | 18.5   |
| 17 | ethyl-methyl                              | 44      | 56      | 966.3   | 190.7  |
| 18 | ethyl-methyl                              | 74      | 26      | 600.5   | 138.0  |
| 19 | hydroxyethyl-methyl                       | 24      | 76      | 460.7   | 70.2   |
| 20 | hydroxyethyl-methyl                       | 54      | 46      | 483.2   | 105.8  |
| 21 | hydroxypropyl-methyl                      | 35      | 65      | 313.1   | 31.2   |
| 22 | hydroxypropyl-methyl                      | 52      | 48      | 274.5   | 56.8   |
| 23 | n-butyl-hydroxyethyl                      | 60      | 40      | 97.8    | 20.4   |
| 24 | n-butyl-methyl                            | 73      | 27      | 310.1   | 70.0   |
| 25 | n-butyl-methyl                            | 59      | 41      | 138.0   | 31.7   |
| 26 | n-butyl-methyl                            | 31      | 69      | 634.0   | 156.7  |

|    |                                  |    |    |       |       |
|----|----------------------------------|----|----|-------|-------|
| 27 | octyl-methyl                     | 50 | 50 | 103.5 | 11.2  |
| 28 | t-butyl-methyl                   | 57 | 43 | 446.9 | 115.7 |
| 29 | t-butyl-methyl                   | 70 | 30 | 402.8 | 100.2 |
| 30 | tetrahydrofurfuryl-cyclohexyl    | 27 | 73 | 384.9 | 92.2  |
| 31 | tetrahydrofurfuryl-cyclohexyl    | 50 | 50 | 467.1 | 112.5 |
| 32 | tetrahydrofurfuryl-cyclohexyl    | 77 | 23 | 291.4 | 64.4  |
| 33 | tetrahydrofurfuryl-hydroxypropyl | 49 | 51 | 123.7 | 19.0  |
| 34 | tetrahydrofurfuryl-isobornyl     | 66 | 34 | 108.7 | 7.9   |
| 35 | tetrahydrofurfuryl-Methyl        | 24 | 76 | 422.0 | 56.0  |
| 36 | tetrahydrofurfuryl-methyl        | 29 | 71 | 468.2 | 89.4  |
| 37 | tetrahydrofurfuryl-methyl        | 53 | 47 | 155.8 | 25.8  |
| 38 | tetrahydrofurfuryl-methyl        | 83 | 17 | 117.8 | 12.8  |
| 39 | tetrahydrofurfuryl-methyl        | 29 | 71 | 398.4 | 84.1  |
| 40 | trifluoroethyl-methyl            | 52 | 48 | 259.8 | 60.3  |
| 41 | trifluoroethyl-methyl            | 80 | 20 | 303.7 | 65.1  |
| 42 | trifluoroethyl-methyl            | 54 | 46 | 177.3 | 25.3  |
| 43 | trifluoroethyl-methyl            | 35 | 65 | 360.8 | 85.3  |

#### Protein attachment-Terpolymers

| #  | Name                                              | Comp. 1 | Comp. 2 | Comp. 3 | Exp   | SD    |
|----|---------------------------------------------------|---------|---------|---------|-------|-------|
| 1  | benzyl-methyl-methacrylic acid                    | 42      | 40      | 18      | 619.7 | 149.2 |
| 2  | benzyl-methyl-tetrahydrofurfuryl                  | 32      | 30      | 38      | 159.7 | 17.5  |
| 3  | Cyclohexyl-EGMA-(Methacryloxysuc                  | 38      | 39      | 23      | 92.6  | 18.7  |
| 4  | Cyclohexyl-TEGMA-Benzyl                           | 33      | 33      | 34      | 118.3 | 17.3  |
| 5  | EGMA-Hydroxyethyl-THF                             | 40      | 30      | 30      | 119.8 | 13.2  |
| 6  | EGMA-THF-Trifluoroethyl                           | 33      | 33      | 34      | 137.1 | 12.9  |
| 7  | Ethyl-Octyl-Hydroxypropyl                         | 33      | 33      | 34      | 96.1  | 10.6  |
| 8  | Ethyl-Octyl-Isobornyl                             | 31      | 33      | 36      | 114.4 | 21.8  |
| 9  | Ethyl-tButyl-Lauryl                               | 28      | 36      | 36      | 112.0 | 16.9  |
| 10 | hydroxypropyl-hydroxyethyl-<br>dimethylaminoethyl | 35      | 29      | 36      | 475.2 | 109.7 |
| 11 | isoButyl-Benzyl-THF                               | 31      | 31      | 38      | 447.1 | 95.6  |
| 12 | isoButyl-EGMA-(methacryloxysuc                    | 38      | 43      | 19      | 81.4  | 11.2  |
| 13 | isoButyl-Octyl-EGMA                               | 37      | 26      | 37      | 118.8 | 13.6  |
| 14 | isoButyl-Undecyl-Cyclohexyl                       | 33      | 33      | 34      | 108.5 | 13.4  |
| 15 | Lauryl-Cyclohexyl-Benzyl                          | 35      | 35      | 30      | 104.5 | 10.1  |
| 16 | Lauryl-Isobornyl-Hydroxyethyl                     | 33      | 33      | 34      | 93.7  | 8.4   |
| 17 | Methacrylic acid-nButyl-THF                       | 33      | 33      | 34      | 474.5 | 58.7  |
| 18 | nButyl-Cyclohexyl-Undecyl                         | 33      | 33      | 34      | 90.7  | 6.6   |
| 19 | nButyl-THF-Trifluoroethyl                         | 38      | 31      | 31      | 618.0 | 151.8 |
| 20 | nButyl-Undecyl-EGMA                               | 30      | 35      | 35      | 96.6  | 9.4   |
| 21 | Octyl-EGMA-THF                                    | 33      | 33      | 34      | 116.8 | 13.9  |
| 22 | Octyl-Isobornyl-Hydroxypropyl                     | 33      | 33      | 34      | 96.1  | 7.5   |
| 23 | tButyl-Hydroxypropyl-THF                          | 36      | 32      | 32      | 364.3 | 51.2  |
| 24 | tButyl-Lauryl-Hydroxypropyl                       | 33      | 33      | 34      | 80.4  | 8.8   |
| 25 | tetrahydrofurfuryl-methyl-benzyl                  | 41      | 33      | 26      | 327.6 | 71.0  |

|    |                                    |    |    |    |       |      |
|----|------------------------------------|----|----|----|-------|------|
| 26 | tetrahydrofurfuryl-methyl-isobutyl | 41 | 29 | 30 | 120.8 | 13.7 |
| 27 | Undecyl-Benzyl-Hydroxyethyl        | 33 | 33 | 34 | 90.2  | 12.8 |
| 28 | Undecyl-Benzyl-Trifluoroethyl      | 33 | 33 | 34 | 88.1  | 11.7 |
| 29 | Undecyl-Cyclohexyl-THF             | 33 | 33 | 34 | 108.0 | 18.3 |

#### Cell Attachment-Homopolymers

| No | Name                              | Exp  | SD   |
|----|-----------------------------------|------|------|
| 1  | poly-methyl-MA                    | 0.42 | 0.03 |
| 2  | poly-ethyl-MA                     | 0.37 | 0.02 |
| 3  | poly-isobutyl-MA                  | 0.31 | 0.03 |
| 4  | poly-tbutyl-MA                    | 0.31 | 0.04 |
| 5  | poly-noctyl-MA                    | 0.93 | 0.04 |
| 6  | poly-cyclohexyl-MA                | 0.24 | 0.02 |
| 7  | poly-phenyl-MA                    | 0.34 | 0.05 |
| 8  | poly-benzyl-MA                    | 0.30 | 0.09 |
| 9  | poly-isobornyl-MA                 | 0.62 | 0.05 |
| 10 | poly-ethyleneglycolmehtylether-MA | 0.63 | 0.05 |
| 11 | poly-2hydroxypropyl-MA            | 0.21 | 0.02 |
| 12 | poly-tetrahydrofurfuryl-MA        | 0.69 | 0.05 |
| 13 | poly-2dimethylaminoethyl-MA       | 0.80 | 0.03 |

#### Cell Attachment-Copolymers

| #  | Name                                      | Comp. 1 | Comp. 2 | Exp  | SD   |
|----|-------------------------------------------|---------|---------|------|------|
| 1  | benzyl-hydroxyethyl                       | 49      | 51      | 0.66 | 0.08 |
| 2  | benzyl-hydroxypropyl                      | 51      | 49      | 0.56 | 0.06 |
| 3  | benzyl-hydroxypropyl                      | 71      | 29      | 0.42 | 0.03 |
| 4  | benzyl-methyl                             | 21      | 79      | 0.42 | 0.06 |
| 5  | benzyl-methyl                             | 50      | 50      | 0.64 | 0.07 |
| 6  | benzyl-methyl                             | 70      | 30      | 0.52 | 0.04 |
| 7  | benzyl-methyl                             | 30      | 70      | 0.51 | 0.05 |
| 8  | benzyl-methyl                             | 54      | 46      | 0.54 | 0.03 |
| 9  | cyclohexyl-hydroxypropyl                  | 23      | 77      | 0.52 | 0.02 |
| 10 | cyclohexyl-hydroxypropyl                  | 51      | 49      | 0.50 | 0.06 |
| 11 | cyclohexyl-methyl                         | 21      | 79      | 0.50 | 0.06 |
| 12 | cyclohexyl-methyl                         | 44      | 56      | 0.47 | 0.04 |
| 13 | cyclohexyl-methyl                         | 75      | 25      | 0.38 | 0.02 |
| 14 | dimethylaminoethyl-methyl                 | 63      | 37      | 0.22 | 0.07 |
| 15 | ethylene glycol methyl ether-hydroxyethyl | 54      | 46      | 0.52 | 0.06 |
| 16 | ethylene glycol methyl ether-Methyl       | 53      | 47      | 0.42 | 0.08 |
| 17 | ethylene glycol methyl ether-methyl       | 76      | 24      | 0.85 | 0.07 |
| 18 | ethyl-methyl                              | 44      | 56      | 0.83 | 0.04 |
| 19 | ethyl-methyl                              | 74      | 26      | 0.83 | 0.05 |

|    |                                  |    |    |      |      |
|----|----------------------------------|----|----|------|------|
| 20 | glycidyl-methyl                  | 36 | 64 | 0.89 | 0.05 |
| 21 | glycidyl-methyl                  | 44 | 56 | 0.85 | 0.04 |
| 22 | hydroxyethyl-methyl              | 24 | 76 | 0.64 | 0.06 |
| 23 | hydroxyethyl-methyl              | 54 | 46 | 0.66 | 0.03 |
| 24 | hydroxypropyl-methyl             | 35 | 65 | 0.80 | 0.02 |
| 25 | hydroxypropyl-methyl             | 52 | 48 | 0.92 | 0.03 |
| 26 | isobornyl-methyl                 | 20 | 80 | 0.74 | 0.09 |
| 27 | isobornyl-methyl                 | 57 | 43 | 0.80 | 0.08 |
| 28 | isobornyl-methyl                 | 82 | 18 | 0.81 | 0.09 |
| 29 | n-butyl-hydroxyethyl             | 60 | 40 | 0.64 | 0.05 |
| 30 | n-butyl-hydroxyethyl             | 79 | 21 | 0.72 | 0.04 |
| 31 | n-butyl-methyl                   | 73 | 27 | 0.72 | 0.07 |
| 32 | n-butyl-methyl                   | 59 | 41 | 0.58 | 0.07 |
| 33 | n-butyl-methyl                   | 31 | 69 | 0.53 | 0.05 |
| 34 | octyl-methyl                     | 50 | 50 | 0.52 | 0.06 |
| 35 | octyl-methyl                     | 75 | 25 | 0.56 | 0.06 |
| 36 | t-butyl-methyl                   | 20 | 80 | 0.59 | 0.08 |
| 37 | t-butyl-methyl                   | 57 | 43 | 0.69 | 0.13 |
| 38 | t-butyl-methyl                   | 70 | 30 | 0.59 | 0.07 |
| 39 | tetrahydrofurfuryl-cyclohexyl    | 27 | 73 | 0.51 | 0.04 |
| 40 | tetrahydrofurfuryl-cyclohexyl    | 50 | 50 | 0.54 | 0.02 |
| 41 | tetrahydrofurfuryl-cyclohexyl    | 77 | 23 | 0.57 | 0.03 |
| 42 | tetrahydrofurfuryl-hydroxypropyl | 49 | 51 | 0.70 | 0.15 |
| 43 | tetrahydrofurfuryl-isobornyl     | 46 | 54 | 0.53 | 0.05 |
| 44 | tetrahydrofurfuryl-isobornyl     | 66 | 34 | 0.63 | 0.05 |
| 45 | tetrahydrofurfuryl-Methyl        | 24 | 76 | 0.74 | 0.08 |
| 46 | tetrahydrofurfuryl-methyl        | 29 | 71 | 0.80 | 0.09 |
| 47 | tetrahydrofurfuryl-methyl        | 53 | 47 | 0.59 | 0.09 |
| 48 | tetrahydrofurfuryl-methyl        | 83 | 17 | 0.73 | 0.07 |
| 49 | tetrahydrofurfuryl-methyl        | 29 | 71 | 0.72 | 0.05 |
| 50 | trifluoroethyl-methyl            | 52 | 48 | 0.75 | 0.08 |
| 51 | trifluoroethyl-methyl            | 80 | 20 | 0.45 | 0.04 |
| 52 | trifluoroethyl-methyl            | 54 | 46 | 0.58 | 0.08 |
| 53 | trifluoroethyl-methyl            | 35 | 65 | 0.67 | 0.05 |

#### Cell Attachment-Terpolymers

| # | Name                             | Comp. 1 | Comp.2 | Comp.3 | Exp  | SD   |
|---|----------------------------------|---------|--------|--------|------|------|
| 1 | benzyl-methyl-tetrahydrofurfuryl | 32      | 30     | 38     | 0.82 | 0.09 |
| 2 | Cyclohexyl-EGMA-(Methacryloxysuc | 38      | 38     | 24     | 0.82 | 0.06 |
| 3 | Cyclohexyl-TEGMA-Benzyl          | 33      | 33     | 34     | 0.88 | 0.03 |
| 4 | EGMA-Hydroxyethyl-THF            | 4       | 30     | 30     | 0.84 | 0.04 |
| 5 | EGMA-THF-Trifluoroethyl          | 33      | 33     | 34     | 0.70 | 0.05 |
| 6 | Ethyl-Benzyl-TEGMA               | 40      | 30     | 30     | 0.81 | 0.06 |
| 7 | Ethyl-Octyl-Hydroxypropyl        | 33      | 33     | 34     | 0.59 | 0.07 |

|    |                                               |    |    |    |      |      |
|----|-----------------------------------------------|----|----|----|------|------|
| 8  | Ethyl-Octyl-Isobornyl                         | 31 | 33 | 36 | 0.81 | 0.04 |
| 9  | Ethyl-tButyl-Lauryl                           | 28 | 36 | 36 | 0.57 | 0.07 |
| 10 | hydroxypropyl-hydroxyethyl-dimethylaminoethyl | 35 | 29 | 36 | 0.81 | 0.05 |
| 11 | isoButyl-EGMA-(methacryloxysuc                | 38 | 43 | 19 | 0.70 | 0.09 |
| 12 | isoButyl-Undecyl-Cyclohexyl                   | 33 | 33 | 34 | 0.30 | 0.07 |
| 13 | Lauryl-Cyclohexyl-Benzyl                      | 35 | 35 | 30 | 0.38 | 0.05 |
| 14 | Lauryl-Isobornyl-Hydroxyethyl                 | 33 | 33 | 34 | 0.44 | 0.07 |
| 15 | Methacrylic acid-nButyl-THF                   | 33 | 33 | 34 | 0.19 | 0.05 |
| 16 | Methyl-Isobornyl-Trifluoroethyl               | 31 | 31 | 38 | 1.03 | 0.12 |
| 17 | nButyl-Cyclohexyl-Undecyl                     | 33 | 33 | 34 | 0.45 | 0.14 |
| 18 | nButyl-THF-Trifluoroethyl                     | 38 | 31 | 31 | 0.36 | 0.15 |
| 19 | nButyl-Undecyl-EGMA                           | 30 | 35 | 35 | 0.57 | 0.10 |
| 20 | Octyl-EGMA-THF                                | 33 | 33 | 34 | 0.55 | 0.13 |
| 21 | Octyl-Isobornyl-Hydroxypropyl                 | 33 | 33 | 34 | 0.39 | 0.09 |
| 22 | tButyl-Hydroxypropyl-THF                      | 36 | 32 | 32 | 0.27 | 0.06 |
| 23 | tButyl-Lauryl-Hydroxypropyl                   | 33 | 33 | 34 | 0.40 | 0.07 |
| 24 | tetrahydrofurfuryl-methyl-benzyl              | 41 | 33 | 26 | 0.44 | 0.07 |
| 25 | tetrahydrofurfuryl-methyl-cyclohexyl          | 37 | 28 | 35 | 0.37 | 0.05 |
| 26 | tetrahydrofurfuryl-methyl-isobutyl            | 41 | 29 | 30 | 0.37 | 0.07 |

#### Cell Proliferation-Homopolymers

| #  | Name                              | Exp   | SD    |
|----|-----------------------------------|-------|-------|
| 1  | poly-methyl-MA                    | 0.36  | 0.08  |
| 2  | poly-ethyl-MA                     | 0.43  | 0.08  |
| 3  | poly-isobutyl-MA                  | 0.99  | 0.16  |
| 4  | poly-tbutyl-MA                    | 0.51  | 0.07  |
| 5  | poly-noctyl-MA                    | 0.44  | 0.08  |
| 6  | poly-cyclohexyl-MA                | 0.31  | 0.09  |
| 7  | poly-phenyl-MA                    | 0.13  | 0.06  |
| 8  | poly-benzyl-MA                    | 0.17  | 0.05  |
| 9  | poly-isobornyl-MA                 | -0.06 | -0.03 |
| 10 | poly-ethyleneglycolmehtylether-MA | 0.67  | 0.15  |
| 11 | poly-2hydroxypropyl-MA            | 0.08  | 0.03  |
| 12 | poly-tetrahydrofurfuryl-MA        | 1.26  | 0.21  |
| 13 | poly-2dimethylaminoethyl-MA       | 0.74  | 0.12  |

#### Cell Proliferation-Copolymers

| # | Name                 | compo1 | compo2 | Exp  | SD   |
|---|----------------------|--------|--------|------|------|
| 1 | benzyl-hydroxyethyl  | 49     | 51     | 0.73 | 0.10 |
| 2 | benzyl-hydroxypropyl | 51     | 49     | 1.21 | 0.19 |
| 3 | benzyl-hydroxypropyl | 71     | 29     | 0.76 | 0.13 |
| 4 | benzyl-methyl        | 21     | 79     | 1.18 | 0.16 |
| 5 | benzyl-methyl        | 50     | 50     | 0.72 | 0.15 |

|    |                                           |    |    |      |      |
|----|-------------------------------------------|----|----|------|------|
| 6  | benzyl-methyl                             | 70 | 30 | 0.80 | 0.13 |
| 7  | benzyl-methyl                             | 30 | 70 | 1.39 | 0.19 |
| 8  | benzyl-methyl                             | 54 | 46 | 0.75 | 0.13 |
| 9  | cyclohexyl-hydroxypropyl                  | 23 | 77 | 1.09 | 0.16 |
| 10 | cyclohexyl-hydroxypropyl                  | 51 | 49 | 0.94 | 0.17 |
| 11 | cyclohexyl-methyl                         | 21 | 79 | 0.71 | 0.12 |
| 12 | cyclohexyl-methyl                         | 44 | 56 | 0.69 | 0.10 |
| 13 | cyclohexyl-methyl                         | 75 | 25 | 0.77 | 0.13 |
| 14 | dimethylaminoethyl-methyl                 | 63 | 37 | 0.01 | 0.02 |
| 15 | ethylene glycol methyl ether-hydroxyethyl | 54 | 46 | 0.32 | 0.05 |
| 16 | ethylene glycol methyl ether-Methyl       | 53 | 47 | 1.11 | 0.13 |
| 17 | ethylene glycol methyl ether-methyl       | 76 | 24 | 0.63 | 0.74 |
| 18 | ethyl-methyl                              | 44 | 56 | 0.05 | 0.07 |
| 19 | ethyl-methyl                              | 74 | 26 | 0.37 | 0.45 |
| 20 | glycidyl-methyl                           | 36 | 64 | 0.72 | 0.85 |
| 21 | glycidyl-methyl                           | 44 | 56 | 0.22 | 0.26 |
| 22 | hydroxyethyl-methyl                       | 24 | 76 | 0.48 | 0.56 |
| 23 | hydroxyethyl-methyl                       | 54 | 46 | 0.82 | 0.96 |
| 24 | hydroxypropyl-methyl                      | 35 | 65 | 0.47 | 0.55 |
| 25 | hydroxypropyl-methyl                      | 52 | 48 | 1.10 | 1.29 |
| 26 | isobornyl-methyl                          | 20 | 80 | 0.56 | 0.66 |
| 27 | isobornyl-methyl                          | 57 | 43 | 0.52 | 0.61 |
| 28 | isobornyl-methyl                          | 82 | 18 | 0.43 | 0.50 |
| 29 | n-butyl-hydroxyethyl                      | 60 | 40 | 0.42 | 0.11 |
| 30 | n-butyl-hydroxyethyl                      | 79 | 21 | 0.35 | 0.08 |
| 31 | n-butyl-methyl                            | 73 | 27 | 0.29 | 0.07 |
| 32 | n-butyl-methyl                            | 59 | 41 | 0.28 | 0.06 |
| 33 | n-butyl-methyl                            | 31 | 69 | 0.06 | 0.01 |
| 34 | octyl-methyl                              | 50 | 50 | 0.05 | 0.02 |
| 35 | octyl-methyl                              | 75 | 25 | 0.05 | 0.02 |
| 36 | t-butyl-methyl                            | 20 | 80 | 0.16 | 0.05 |
| 37 | t-butyl-methyl                            | 57 | 43 | 0.26 | 0.06 |
| 38 | t-butyl-methyl                            | 70 | 30 | 0.30 | 0.06 |
| 39 | tetrahydrofurfuryl-cyclohexyl             | 27 | 73 | 0.34 | 0.06 |
| 40 | tetrahydrofurfuryl-cyclohexyl             | 50 | 50 | 0.76 | 0.09 |
| 41 | tetrahydrofurfuryl-cyclohexyl             | 77 | 23 | 0.88 | 0.06 |
| 42 | tetrahydrofurfuryl-hydroxypropyl          | 49 | 51 | 0.39 | 0.09 |
| 43 | tetrahydrofurfuryl-isobornyl              | 46 | 54 | 0.44 | 0.08 |
| 44 | tetrahydrofurfuryl-isobornyl              | 66 | 34 | 0.44 | 0.04 |
| 45 | tetrahydrofurfuryl-Methyl                 | 24 | 76 | 0.44 | 0.07 |
| 46 | tetrahydrofurfuryl-methyl                 | 29 | 71 | 0.63 | 0.10 |
| 47 | tetrahydrofurfuryl-methyl                 | 53 | 47 | 0.50 | 0.08 |
| 48 | tetrahydrofurfuryl-methyl                 | 83 | 17 | 0.93 | 0.13 |
| 49 | tetrahydrofurfuryl-methyl                 | 29 | 71 | 0.42 | 0.07 |
| 50 | trifluoroethyl-methyl                     | 52 | 48 | 0.41 | 0.07 |

|    |                       |    |    |      |      |
|----|-----------------------|----|----|------|------|
| 51 | trifluoroethyl-methyl | 80 | 20 | 2.18 | 0.26 |
| 52 | trifluoroethyl-methyl | 54 | 46 | 0.42 | 0.07 |
| 53 | trifluoroethyl-methyl | 35 | 65 | 0.30 | 0.06 |

### Cell Proliferation-Terpolymers

| #  | Name                                              | Comp. 1 | Comp. 2 | Comp. 3 | Exp   | SD   |
|----|---------------------------------------------------|---------|---------|---------|-------|------|
| 1  | benzyl-methyl-tetrahydrofurfuryl                  | 32      | 30      | 38      | 0.54  | 0.09 |
| 2  | Cyclohexyl-EGMA-(Methacryloxysuc                  | 38      | 38      | 24      | 0.31  | 0.06 |
| 3  | Cyclohexyl-TEGMA-Benzyl                           | 33      | 33      | 34      | 0.64  | 0.02 |
| 4  | EGMA-Hydroxyethyl-THF                             | 4       | 30      | 30      | 0.65  | 0.04 |
| 5  | EGMA-THF-Trifluoroethyl                           | 33      | 33      | 34      | 0.32  | 0.05 |
| 6  | Ethyl-Benzyl-TEGMA                                | 40      | 30      | 30      | 0.73  | 0.05 |
| 7  | Ethyl-Octyl-Hydroxypropyl                         | 33      | 33      | 34      | 0.46  | 0.07 |
| 8  | Ethyl-Octyl-Isobornyl                             | 31      | 33      | 36      | 0.19  | 0.04 |
| 9  | Ethyl-tButyl-Lauryl                               | 28      | 36      | 36      | 0.17  | 0.07 |
| 10 | hydroxypropyl-hydroxyethyl-<br>dimethylaminoethyl | 35      | 29      | 36      | 0.86  | 0.05 |
| 11 | isoButyl-EGMA-(methacryloxysuc                    | 38      | 43      | 19      | -0.02 | 0.09 |
| 12 | isoButyl-Undecyl-Cyclohexyl                       | 33      | 33      | 34      | 0.74  | 0.07 |
| 13 | Lauryl-Cyclohexyl-Benzyl                          | 35      | 35      | 30      | 0.65  | 0.05 |
| 14 | Lauryl-Isobornyl-Hydroxyethyl                     | 33      | 33      | 34      | 0.68  | 0.07 |
| 15 | Methacrylic acid-nButyl-THF                       | 33      | 33      | 34      | 0.03  | 0.05 |
| 16 | Methyl-Isobornyl-Trifluoroethyl                   | 31      | 31      | 38      | 0.43  | 0.12 |
| 17 | nButyl-Cyclohexyl-Undecyl                         | 33      | 33      | 34      | 0.67  | 0.14 |
| 18 | nButyl-THF-Trifluoroethyl                         | 38      | 31      | 31      | 0.81  | 0.15 |
| 19 | nButyl-Undecyl-EGMA                               | 30      | 35      | 35      | 1.00  | 0.10 |
| 20 | Octyl-EGMA-THF                                    | 33      | 33      | 34      | 1.30  | 0.13 |
| 21 | Octyl-Isobornyl-Hydroxypropyl                     | 33      | 33      | 34      | 0.72  | 0.09 |
| 22 | tButyl-Hydroxypropyl-THF                          | 36      | 32      | 32      | 0.81  | 0.06 |
| 23 | tButyl-Lauryl-Hydroxypropyl                       | 33      | 33      | 34      | 0.94  | 0.07 |
| 24 | tetrahydrofurfuryl-methyl-benzyl                  | 41      | 33      | 26      | 0.86  | 0.07 |
| 25 | tetrahydrofurfuryl-methyl-cyclohexyl              | 37      | 28      | 35      | 0.95  | 0.05 |
| 26 | tetrahydrofurfuryl-methyl-isobutyl                | 41      | 29      | 30      | 1.03  | 0.07 |
